# Supplementary material for: Using Si/MoS2 Core-Shell Nanopillar Arrays Enhances SERS Signal
Source: PubMed Central journal article supplement (PMC8001147; doi:10.3390/nano11030733), 2021-03-15
Supplement: nanomaterials-11-00733-s001.pdf [file nanomaterials-11-00733-s001.pdf]

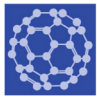

## Supplementary materials

# Using Si/MoS<sub>2</sub> core-shell nanopillar arrays enhances SERS

## Signal

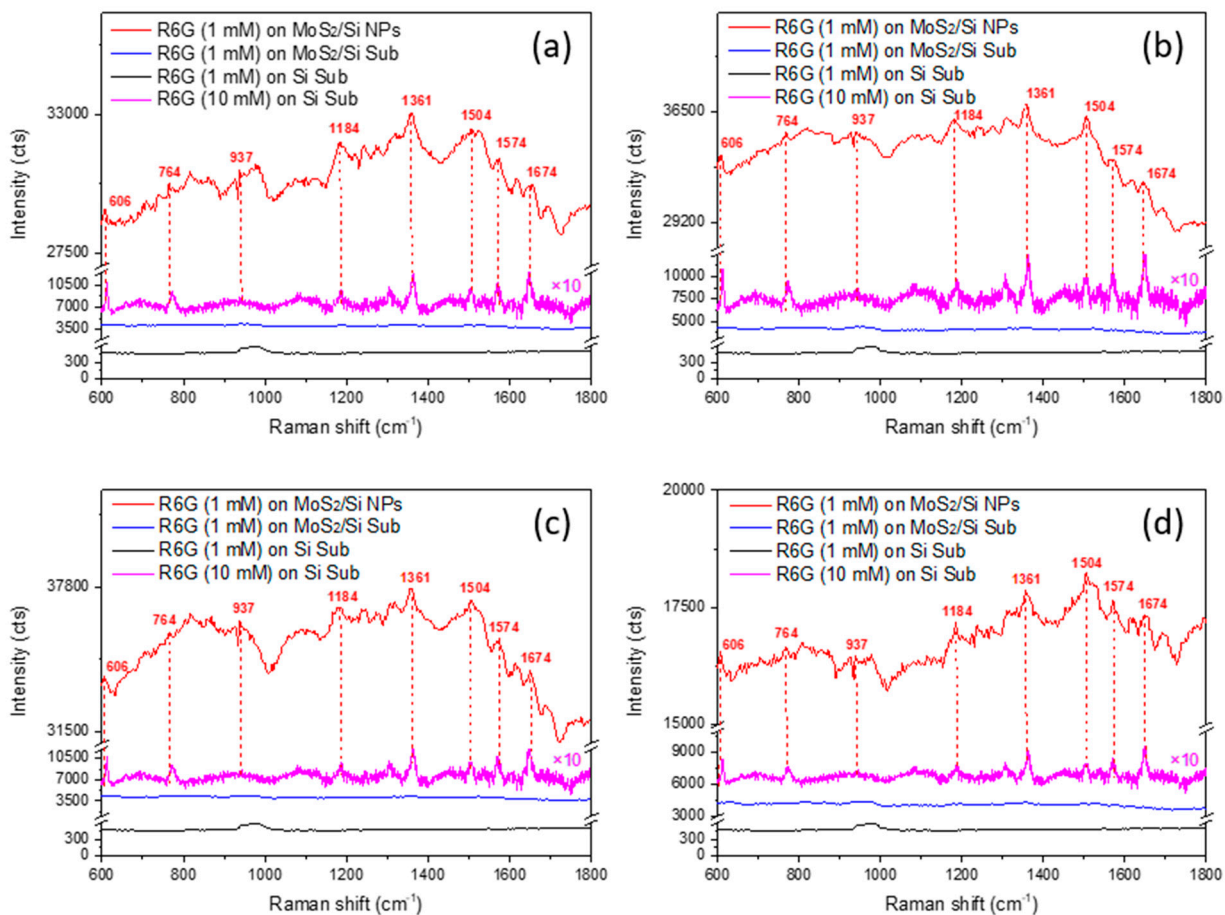

Figure S1. SERS signals of the R6G molecules on the Si, MoS<sub>2</sub> thin film and Si/MoS<sub>2</sub> core-shell NP arrays substrates. An additional SERS signal of the R6G molecules (10 mM) on a Si substrate is included for comparison. The red SERS curves in (a)–(d) were measured from the different positions of the R6G molecules on the Si/MoS<sub>2</sub> core-shell NP arrays substrates.
